# Supplementary material for: Circulating Tumor Cells In Advanced Cervical Cancer: NRG Oncology—Gynecologic Oncology Group Study 240 (NCT 00803062)
Source: Oxford University Press journal article supplement (doi:10.1158/1535-7163.mct-20-0276), 2020-08-26
Supplement: 15357163mct200276-sup-240832_2_supp_6372988_qcr8cb.docx [file 15357163mct200276-sup-240832_2_supp_6372988_qcr8cb.docx]

**Supplementary Figure 1 Panel A**

**
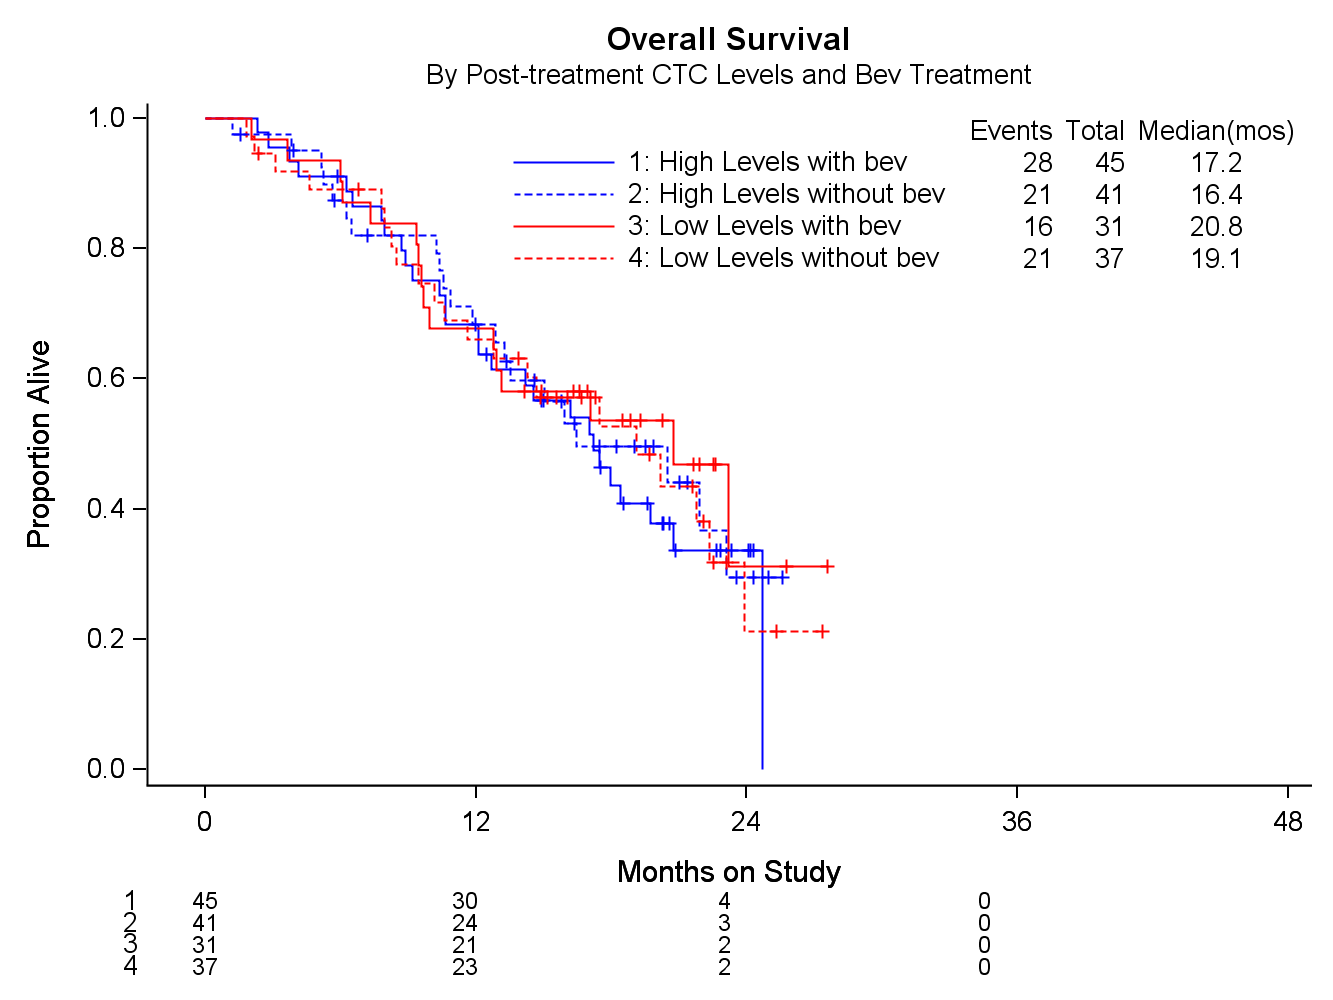
**

**Supplementary Figure 1 Panel B**

**
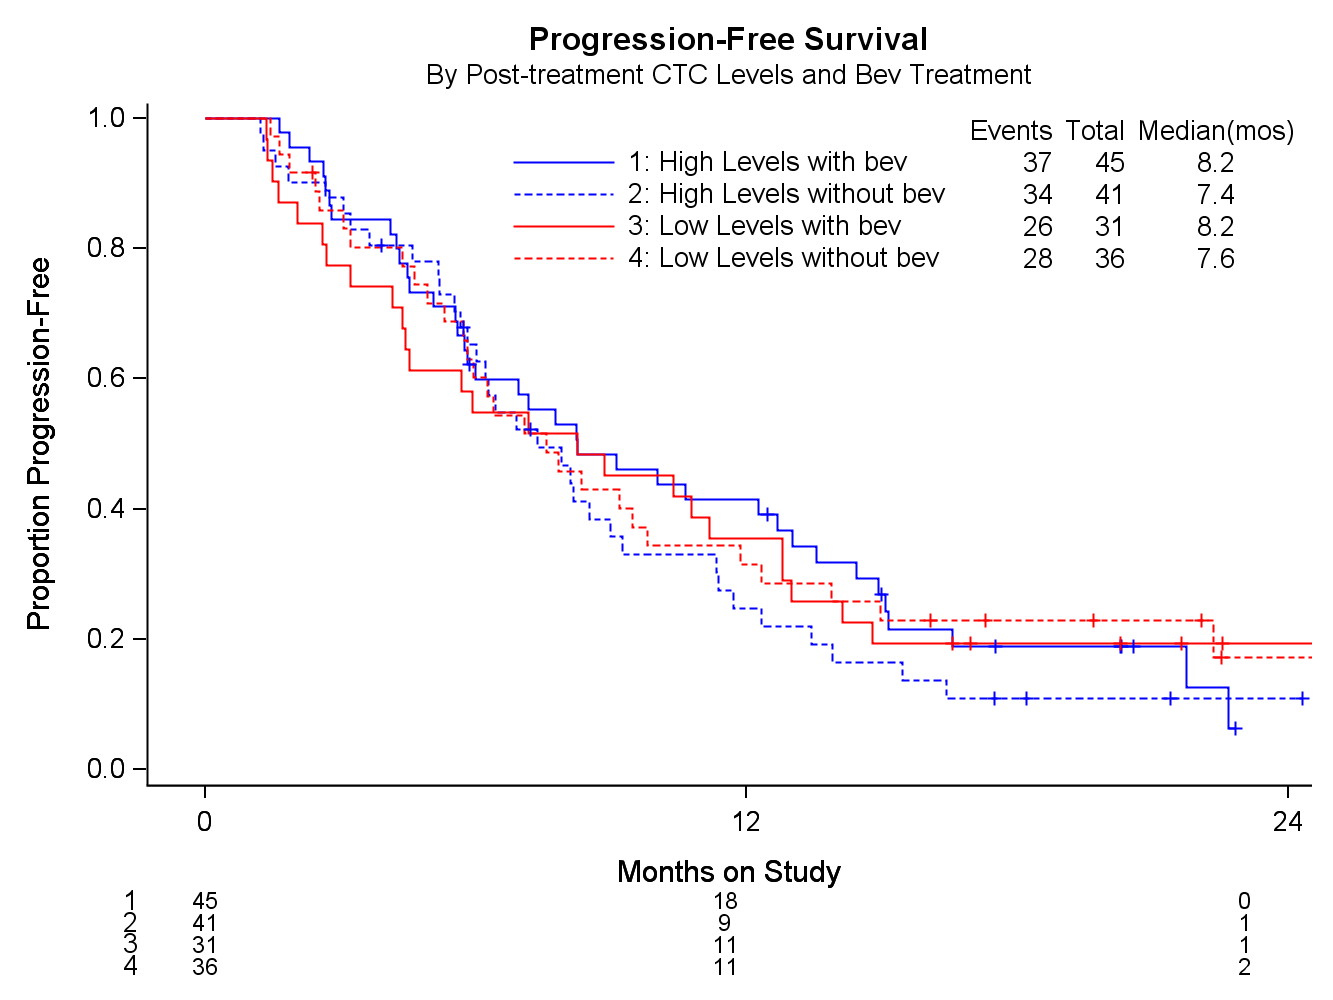
**

**Supplementary Figure 1: Kaplan-Meier curves demonstrating overall survival [HR 1.12; 95% CI, 0.64-1.98] (panel A) and progression-free survival [HR 0.79; 95% CI, 0.49-1.27] (panel B) among patients with high vs low levels of 36 days post-Cycle 1 CTCs stratified by treatment with and without bevacizumab. In this exploratory analysis of 36-day post-Cycle 1 CTC counts, neither overall survival nor progression-free survival appear to be impacted by intervening therapy in which bevacizumab has been integrated.**
